# Supplementary material
Source: PubMed Central journal article supplement (PMC2913848)
Supplement: NIHMS222141-supplement-1.pdf [file NIHMS222141-supplement-1.pdf]

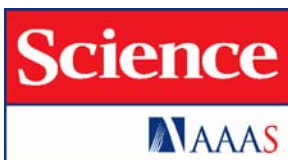

## Supporting Online Material for

### **Regulation of Alternative Splicing by Histone Modifications**

Reini F. Luco, Qun Pan, Kaoru Tominaga, Benjamin J. Blencowe, Olivia M. Pereira-Smith, Tom Misteli\*

\*To whom correspondence should be addressed. E-mail: [mistelit@mail.nih.gov](mailto:mistelit@mail.nih.gov)

Published 4 February 2010 on *Science Express*  
DOI: 10.1126/science.1184208

**This PDF file includes:**

Materials and Methods  
Figs. S1 to S13  
Tables S1 and S2  
References

## MATERIALS AND METHODS

### Cell lines and plasmids

Human normal prostate epithelial PNT2 cells (Sigma), immortalized human mesenchymal hMSC stem cells<sup>S1</sup> and human embryonic kidney HEK 293 cells were grown at 37°C, 5% CO<sub>2</sub> in RPMI (Invitrogen) or DMEM (Invitrogen), respectively, both supplemented with 10% fetal bovine serum. Plasmids were nucleoporated in PNT2 and hMSC cells following the manufacturer's recommendations. Briefly, 5 µg of endo-free plasmid Maxi prep (Qiagen) were electroporated using an Amaxa nucleoporator into 10<sup>6</sup> cells resuspended in 100 µl of either solution V (T30 program) for PNT2 cells or solution hMSC (C17 program) for hMSC cells. HEK 293 were transfected with FuGENE HD (Roche) following the manufacturer's instructions. 40-60% of cells survived typically achieving ~45-60% transfection efficiency. After 48h in culture, transfected cells were used for experimentation. pCDNA3 Flag-hASH2-HA was provided by Dr. D. Skalnik, University School of Medicine, Indianapolis USA, pPTB-HA was provided by Dr. J. Patton, Vanderbilt University, Nashville, Tennessee USA, pEGFPN1-MRG15 and pMRG15-V5/His were generated as described<sup>S2;S3</sup>. Yeast pN823-Flag-Set2 (provided by Dr. B. Strahl, University of North Carolina-Chapel Hill, USA) was subcloned in the mammalian expression plasmid pCDNA3.1 (+). pEGFP-C1 (Clontech) was used as a control.

## **Quantitative RT-PCR**

Total RNA was extracted with the RNeasy mini kit (Qiagen) and 500 ng of total RNA was retro-transcribed (RT) by random priming into cDNA using the High Capacity cDNA RT kit (Applied Biosystems) following the manufacturers' instructions. Quantification of the amount of cDNA was done with IQ-custom SYBR-Green supermix for real-time qPCR (MyIQ, BioRad) with oligonucleotide sequences that specifically recognize FGFR2-IIIb, FGFR2-IIIc, TPM2-e6, TPM2-e7, TPM1-e2, TPM2-e3, PKM2-e9, PKM2-e10 splicing variants. CD44 exon variant v6, HMGA1 exon e2 and VDR exon e2 were used as controls for PTB-independent alternative splicing events. GAPDH exons e6 and e7 were used as controls for constitutive splicing. For validation of the PTB, MRG15 and SETD2 co-dependent AS events predicted by high-throughput sequencing, specific primers against the alternatively spliced exon and a constant region of the candidate gene were designed for assessment of the percentage of exon inclusion. The oligonucleotide sequences used are listed in Supplementary Table S2.

## **RNAi knockdown**

Downregulation of PTB and nPTB was performed using ON-TARGET plus SMARTpool siRNA oligonucleotides and downregulation of MRG15, MRGX and SETD2 was performed using Accell siRNA oligonucleotides (Dharmacon). siRNA oligos against human PTB (L-3528), nPTB (L-21323), SETD2 (A-12448), MRG15 (MORF4L1, A-6379) and MRGX (MORF4L2, A-6380) were delivered to cells following the manufacturer's in-

structions for 72h. Accell siRNA anti-human Cyclophilin B (D-1920) or Accell non-targeting siRNA (D-001910) were used as controls.

### **Chromatin immunoprecipitation (ChIP)**

Approximately  $2.10^6$  cells per sample were crosslinked for 10 min in 1% formaldehyde at room temperature. Cells were washed twice with cold PBS and swelled on ice for 10 min in 25 mM HEPES pH 8, 1.5 mM  $MgCl_2$ , 10 mM KCl, 0.1% NP-40, 1 mM DTT and 1× protease inhibitor cocktail set III (Calbiochem). Following dounce homogenization, the nuclei were collected and resuspended in 1 ml sonication buffer (50 mM HEPES pH 8, 140 mM NaCl, 1 mM EDTA, 0.1% sodium deoxycholate, 0.1% SDS and 1× protease inhibitor cocktail). DNA was sonicated in an ultrasonic bath (Bioruptor Diagenode) to an average length of 200–500 bp. After addition of 1% Triton X-100, samples were centrifuged at 15,000 xg. Supernatants were immunoprecipitated o/n with 40 µl of pre-coated anti-IgG magnetic beads (Dynabeads M-280 Invitrogen) previously incubated with the antibody of interest for 6h at 4°C. The antibodies used were: rabbit anti-MRG15<sup>S2</sup> (10 µL), rabbit anti-H3-K4me1 (4 µg, Abcam ab8895), rabbit anti-H3-K4me2 (2 µg, Upstate 07-030), rabbit anti-H3-K4me3 (5 µg, Upstate 05-745), rabbit anti-H3-K9me1 (5 µg, Abcam ab9045), rabbit anti-H3-K36me3 (3 µg, Abcam ab9050), rabbit anti-H3-K9acetyl (7,5 µg, Upstate 06-942), rabbit anti-H4acetyl (5 µg, Upstate 06-598), mouse anti-H3-K27acetyl<sup>S4</sup> (10 µL), mouse anti-H3-K4me3<sup>S4</sup> (10 µL), mouse anti-H3-K9me1<sup>S4</sup> (50 µL), mouse anti-H3-K36me3 (50 µl, provided by Dr. H. Kimura, University of Osaka), mouse anti-H3-K27me3 (10 µl, provided by Dr. H. Kimura, University of Osaka). Control im-

munoprecipitations were performed with no antibody and input between samples was normalized with rabbit anti-histone H3 ChIP (1  $\mu$ g, Abcam ab1791). Beads were washed sequentially for 5 min each in Low-salt (20 mM Tris-HCl pH 8, 150 mM NaCl, 2 mM EDTA, 1% Triton X-100, 0.1% SDS), High-Salt (20 mM Tris-HCl pH 8, 500 mM NaCl, 2 mM EDTA, 1% Triton X-100, 0.1% SDS) and LiCl buffer (10mM Tris pH 8.0, 1mM EDTA, 250mM LiCl, 1% NP-40, 1% Na-deoxycholate) for 5 min at 4°C and then twice in TE 1x for 2 min at room temperature. Beads were eluted in 1% SDS and 100mM NaHCO<sub>3</sub> buffer for 15 min at 65°C and crosslinking was reversed for 7h after addition of NaCl to a final concentration of 200 mM. Chromatin was precipitated with ethanol o/n, treated with 20  $\mu$ g proteinase K and purified with Qiaquick PCR purification columns (Qiagen) as indicated by the manufacturer. Immunoprecipitated DNA (1.5  $\mu$ l) and serial dilutions of the 10% input DNA (1:4, 1:20, 1:100 and 1:500) were analyzed by SYBR-Green real-time qPCR. The oligonucleotide sequences used are listed in Supplementary Table 2.

### **Co-immunoprecipitation and Western-blotting**

Crosslinked chromatin was isolated and sonicated as described in the ChIP protocol. Protein concentration of clarified samples was performed by Bio-Rad Protein Assay using BSA as a standard. Three mg of pre-cleared protein were immunoprecipitated with either 4  $\mu$ g of mouse anti-PTB antibody (Invitrogen, 32-4800) or 1  $\mu$ g of rabbit anti-His (H-15) (Santa-Cruz, sc-803) in 500  $\mu$ l sonication buffer for 3 h at 4°C. Precipitation with no antibody was performed in parallel as a control and 30  $\mu$ g of protein was kept

as 1% input. Immune complexes were captured by incubation with 30  $\mu$ l of Dynabeads-protein G o/n at 4°C. After washing 4x in 500  $\mu$ l sonication buffer, immune complexes were eluted in 20  $\mu$ l SDS sample buffer and boiled for 5 min. Proteins were separated on 10% SDS-PAGE and transferred onto nitrocellulose membrane. Successful transfer of proteins was confirmed by Ponceau S staining. The membranes were blocked in PBS with 0.05% Tween-20, 2% goat serum, and 0.5% skimmed milk, incubated with the appropriate primary (anti-PTB, anti-MRG15, anti-HA or anti-V5) and secondary antibodies, and washed with PBS-Tween 20. Horseradish peroxidase conjugated secondary antibodies were detected by SuperSignal Chemiluminescent Substrate system (Thermo Scientific).

### **RNA immunoprecipitation (RNA-IP)**

Approximately  $5 \cdot 10^6$  cells per IP were crosslinked with 1% formaldehyde for 15 min at room temperature. After quick PBS-washing, cells were harvested in 3 ml of ice-cold Lysis buffer (50 mM Tris-HCl pH 8, 100 mM NaCl, 5 mM MgCl<sub>2</sub>, 0.5% NP-40). Nuclei were pelleted at 2,000xg for 4 min at 4°C. Pellets were resuspended in 500  $\mu$ l of IP buffer (50mM Tris-HCl pH 8, 140 mM NaCl, 1 mM EDTA, 1% Triton X-100, 0.1% Na-deoxycholate) for sonication in an ultrasonic bath (Bioruptor Diagenode). After spinning at maximum speed for 25 minutes to remove cell debris, the supernatants were incubated o/n with 40  $\mu$ l of pre-coated anti-IgG magnetic beads (Dynabeads M-280 Invitrogen) previously incubated with the antibody of interest for 6h at 4°C. We used 10  $\mu$ l of two different kinds of rabbit anti-PTB for confirmation of the results (provided by Dr.

D. Black, UCLA and Dr. M. Garcia-Blanco, Duke University), 10  $\mu$ L rabbit anti-MRG15<sup>S2</sup> or 25  $\mu$ l mouse anti-SM Y12 (provided by Dr. J. Steitz, Yale). Beads were washed sequentially in RIPA buffer (50mM Tris-HCl pH 8, 150 mM NaCl, 1 mM EDTA, 1% Triton X-100, 0.1% SDS and 0.1% Na-deoxycholate) and high-salt RIPA (RIPA at 500 mM NaCl) for 5 min in a rotation wheel at 4°C and then twice in TE 1x at room temperature for 2 min. Beads were eluted for 15 min at 65°C in 200  $\mu$ l of elution buffer (1% SDS and 100mM NaHCO<sub>3</sub>) and after addition of NaCl to a final concentration of 200 mM, cross-linking was reversed for 4.5 h at 65°C. 1 ml of Trizol (Invitrogen) and 200  $\mu$ l of chloroform were added and spun for 15 min at 12,000 xg for separation of the phases. 700  $\mu$ l of RNase-free ethanol 70% was added to the supernatant and loaded onto RNAeasy mini columns (Qiagen) for RNA extraction following manufacturer's instructions. DNase I digestion was performed to avoid DNA contamination. 30  $\mu$ l of eluted RNA was concentrated in a SpeedVac to 10  $\mu$ l final volume and the entire sample was used for RT-PCR in a final volume of 20  $\mu$ l. Immunoprecipitated RNA (3  $\mu$ l) and serial dilutions of the 10% input RNA (1:2, 1:10 and 1:50) were analyzed by SYBR-Green real-time qPCR. We used the same oligonucleotide sequences as in the ChIP assay. All buffers were sterile, RNase-free and supplemented with 100 U/ml of RNase inhibitor (RNAsine, Promega) and 1x protease inhibitor cocktail set III (Calbiochem).

### **RNA deep-sequencing analysis**

50 mer reads (>2 GB data per sample) were generated using an Illumina GA starting from polyA<sup>+</sup> RNA isolated from hMSC cells transfected with control and targeting

siRNAs. The sequence reads were first aligned to human genomic sequence (NCBI Genome Assembly Build #36) using Bowtie<sup>S5</sup> and reads mapping to multiple locations were removed. The remaining reads were mapped to a database of human exons and splicing junctions, as previously described<sup>S6</sup>, allowing up to two mismatches/indels. The database comprised 27,088 human alternative splicing events identified from alignments of human mRNA/EST sequences to genomic sequence (NCBI Genome Assembly Build #36), essentially as previously described<sup>S7;S8</sup>. Alternative exon inclusion levels (%in) were calculated using the number of reads mapping to exons and splice junctions by the following formula:

$$\%in = \text{Normalized C1:A-A-A:C2} / (\text{Normalized C1:A-A-A:C2} + \text{Normalized C1:C2})$$

C1:A-A-A:C2 represents the exon-included isoform and refers to the sequence of the last 50 nucleotides of the upstream constitutive exon (C1) followed by the alternative exon sequence (A) followed by the first 50 nucleotides of the downstream constitutive exon (C2). C1:C2 represents the exon-skipped isoform and refers to the 50 nucleotides of the upstream constitutive exon joined to the 50 nucleotides of the downstream constitutive exon. The number of reads that mapped to the two isoform sequences were normalized by sequence length.

12,235 alternative splicing events with ten or more reads that map to one or more of the three junction sequences (C1-A, A-C2, C1-C2), in addition to exon mapping reads, were



analyzed further. Only events with a % in change between the factor knockdown and control knockdown of at least 15% were analyzed. Significance of the overlaps between factor knockdowns was calculated using the hypergeometric test.

### **Statistical Analysis**

All values represent means  $\pm$  S.E.M of three to six biological replicas. Statistical significance of the differences between tissues was estimated using the two-tailed paired t-student test comparing either the two cell types or relative to control.

### **SUPPLEMENTARY FIGURES**

Figs. S1, S2, S3, S4, S5, S6, S7, S8, S9, S10, S11, S12, S13

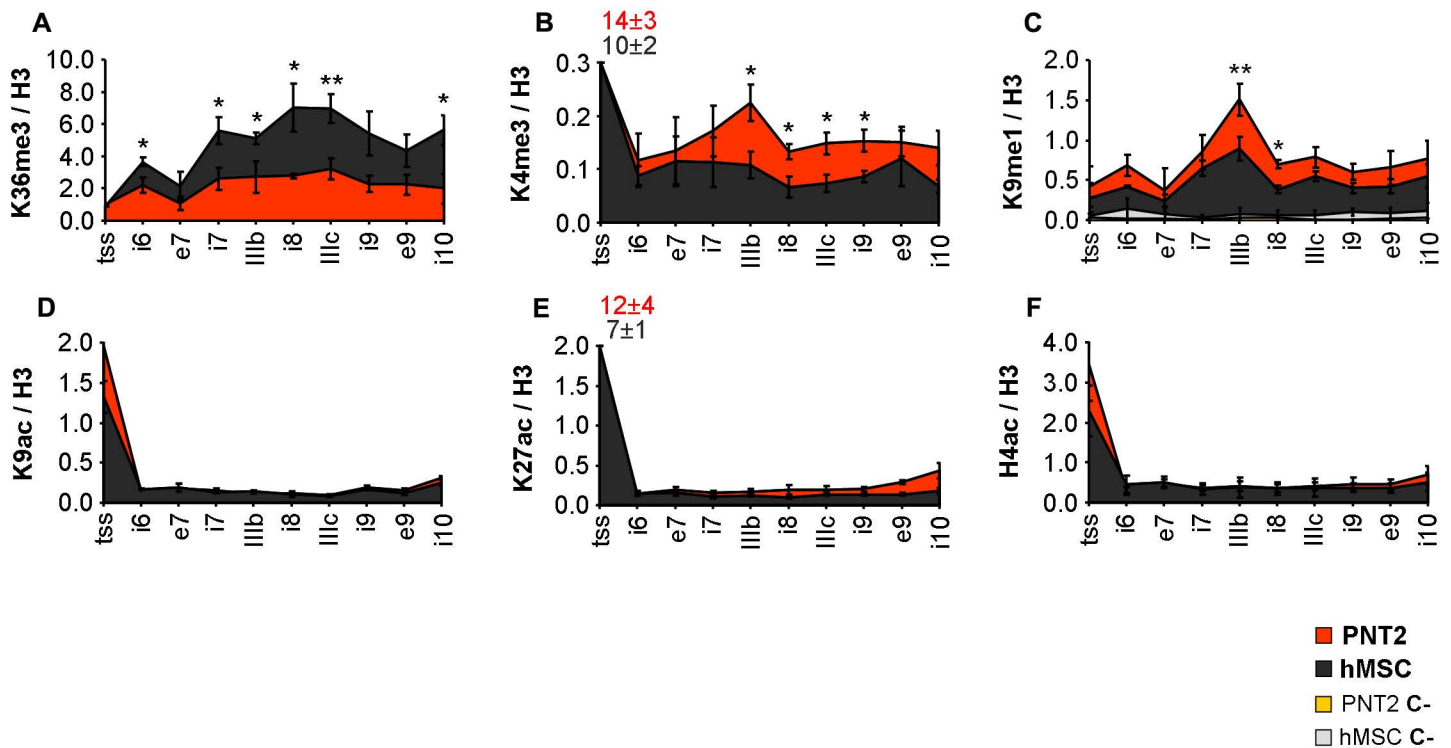

**Supplementary Fig. 1. Histone and chromatin properties along FGFR2.** (A-F) The indicated histone modification was mapped along the FGFR2 gene in PNT2 (red) or hMSC (black) cells using monoclonal (A-C) and polyclonal (D-F) antibodies (see Methods). A no-antibody control is shown in (C) and was typically  $\sim 1/10$  of the signal for a specific antibody. The % input was normalized to unmodified-H3 and values represent means  $\pm$  S.E.M. from 3-5 independent experiments. \* indicates  $p < 0.05$  and \*\* indicates  $p < 0.01$  in t-student test comparing the two cell types.

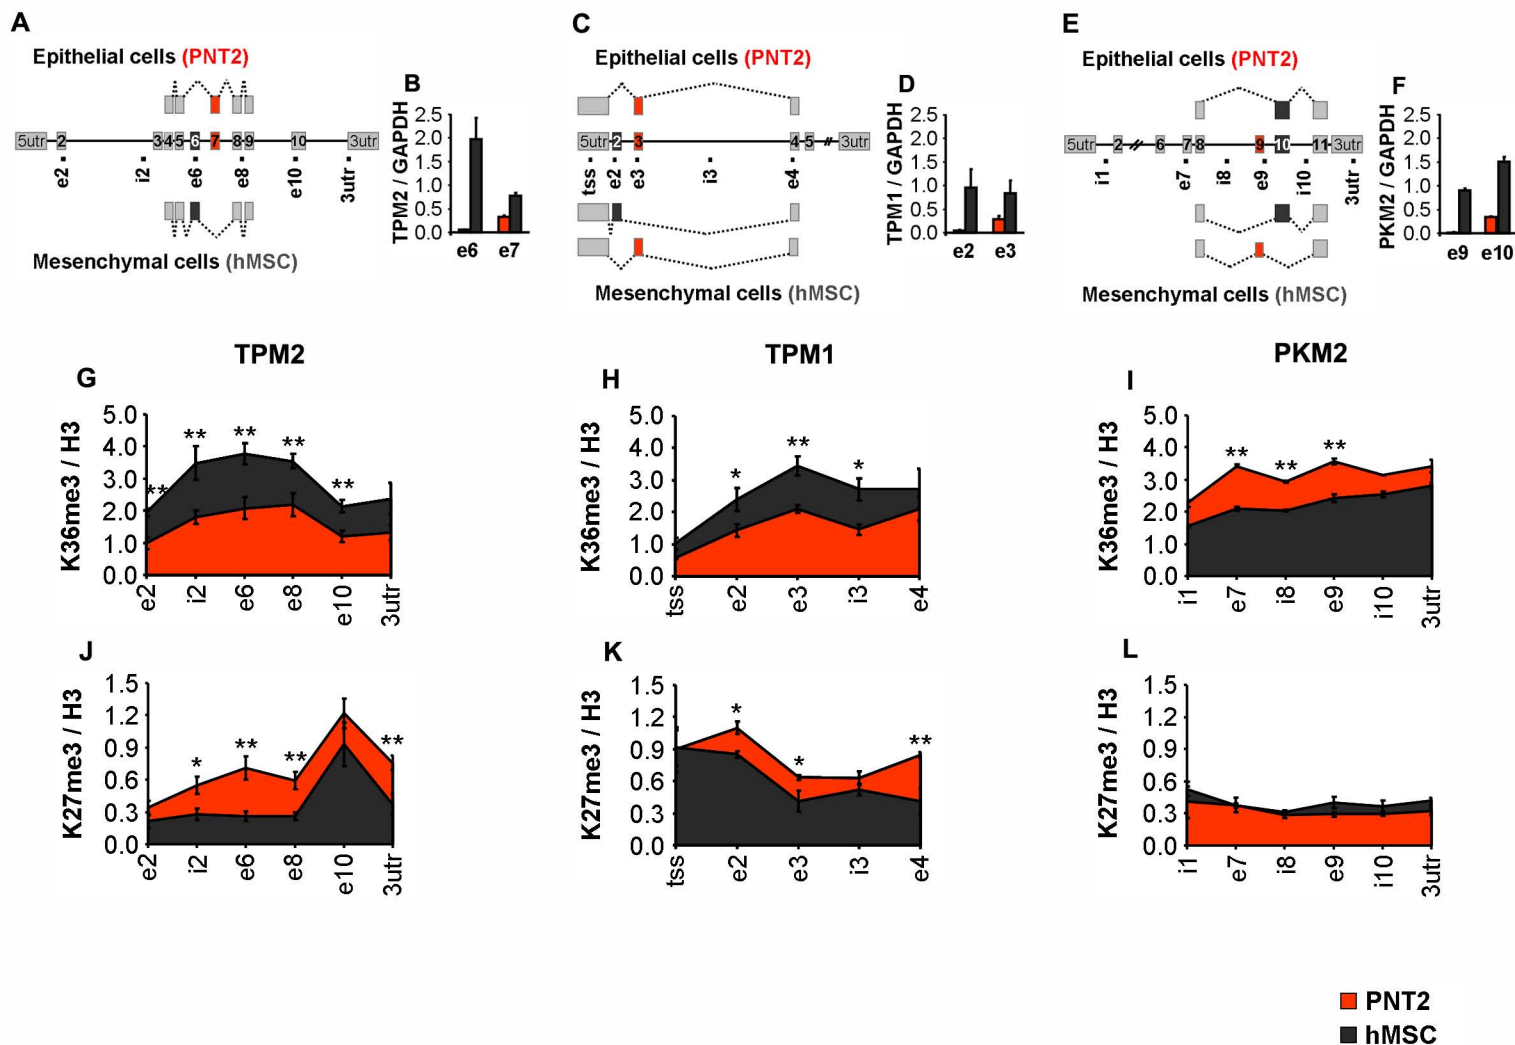

**Supplementary Fig. 2 Histone modifications in the PTB-dependent alternatively spliced TPM2, TPM1 and PKM2 genes.** (A,C,E) Schematic representation of human TPM2, TPM1 and PKM2 genes. Symbols as in Fig. 1. PTB-dependent exon (in red) e7 in TPM2 and e3 in TPM1 are preferentially included in PNT2 cells, whereas e9 in PKM2 is preferentially included in hMSCs. (B, D, F) Expression levels of TPM2 exons e6 and e7, TPM1 e2 and e3 and PKM2 e9 and e10 relative to GAPDH in PNT2 (red) and hMSC (black) cells determined by qPCR. (G-L) Mapping of H3-K36me3 (G-I) and H3-K27me3 (J-L) along TPM2, TPM1 and PKM2 in PNT2 (red) and hMSC (black) cells, using quantitative chromatin immunoprecipitation. The % input was normalized to unmodified-H3 and values represent means  $\pm$  S.E.M. from 5 independent experiments. \* indicates  $p < 0.05$  and \*\* indicates  $p < 0.01$  in t-student test comparing the two cell types.

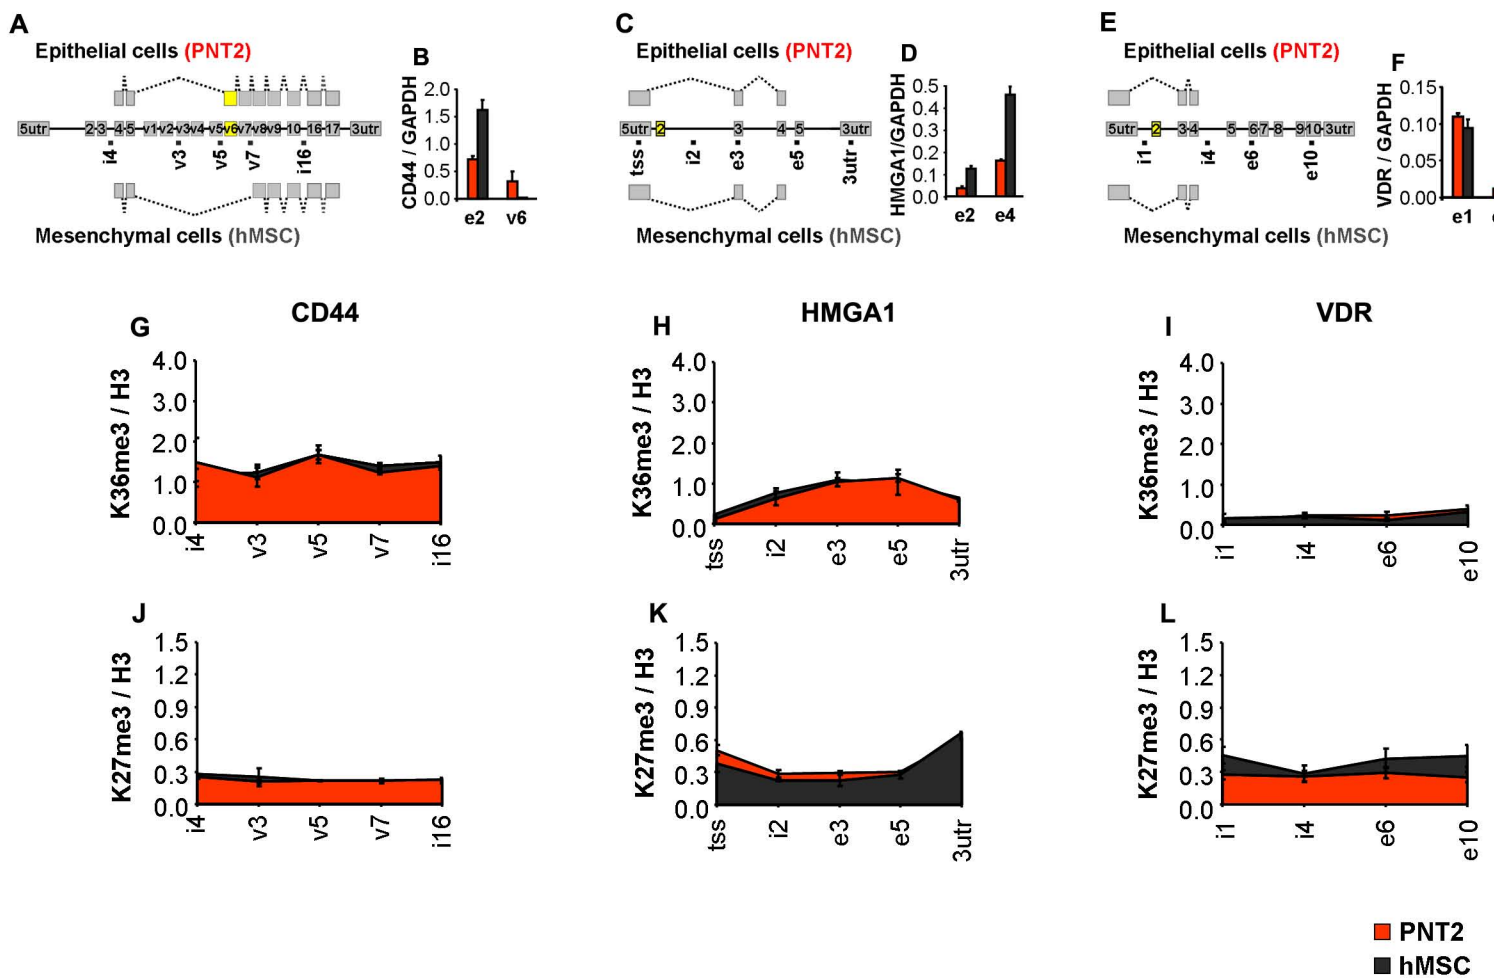

**Supplementary Fig. 3. Histone modifications in PTB-independent alternatively spliced genes.** (A,C,E) Schematic representation of PTB-independent alternatively spliced human CD44, HMGA1 and VDR genes. Symbols as in Fig. 1 except alternatively spliced exons are shown in yellow. (B,D,F) Levels of CD44 constitutive exon e2 and variant 6 (v6), HMGA1 alternative e2 and constitutive e4 and VDR constitutive e1 and alternative e2 in PNT2 (red) and hMSC (black) cells determined by qPCR. CD44 exon v6 is only included in PNT2, whereas HMGA1 e2 and VDR e2 are not included in either cell types. (G-L) Mapping of H3-K36me3 (G-I) and H3-K27me3 (J-L) along CD44, HMGA1 and VDR in PNT2 (red) and hMSC (black) cells, using quantitative chromatin immunoprecipitation. The % input was normalized to unmodified-H3 and values represent means  $\pm$  S.E.M. from 3-4 independent experiments. No significant differences were observed in a t-student test comparing the two cell types.

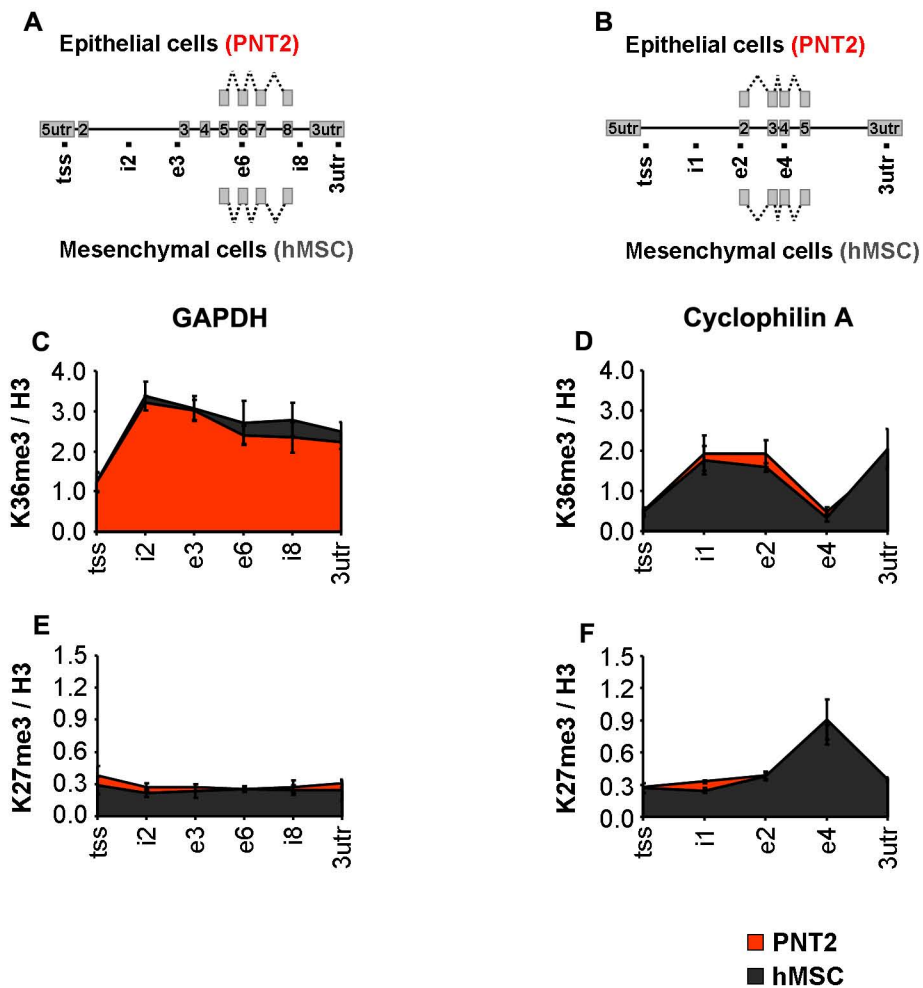

**Supplementary Fig. 4. Histone modifications in the constitutively spliced GAPDH and Cyclophilin A genes.** (A-B) Schematic representation of human GAPDH and Cyclophilin A genes. Symbols as in Fig. 1. (C-F) Mapping of H3-K36me3 (C-D) and H3-K27me3 (E-F) along GAPDH and Cyclophilin A in PNT2 (red) and hMSC (black) cells, using quantitative chromatin immunoprecipitation. The % input was normalized to unmodified-H3 and values represent means  $\pm$  S.E.M. from 3-4 independent experiments. No significant differences were observed in a t-student test comparing the two cell types.

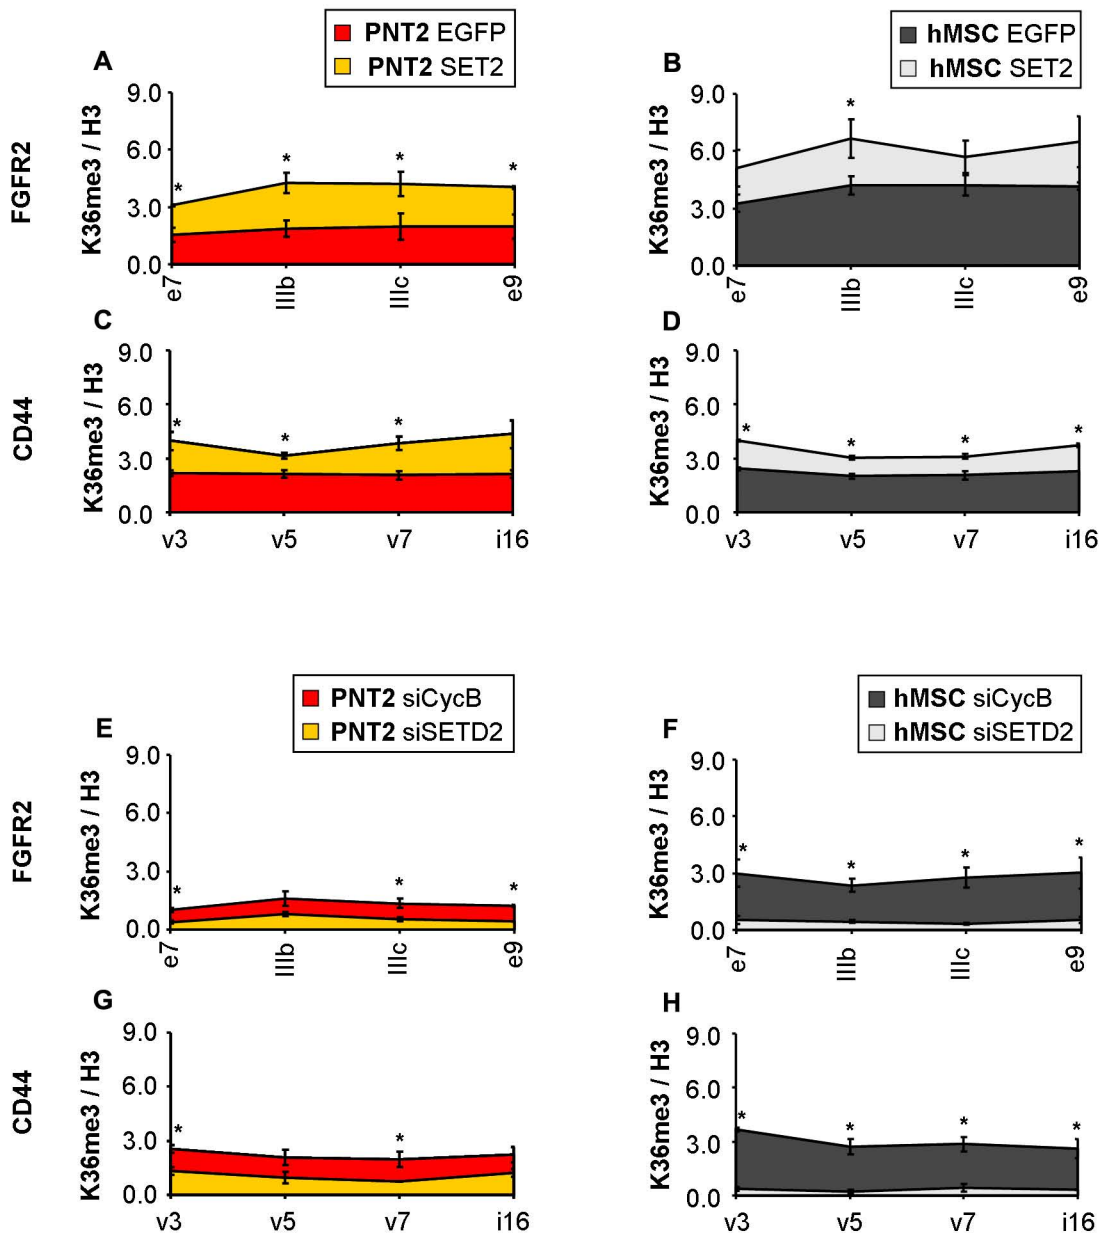

**Supplementary Fig. 5. Confirmation of changes in H3-K36me3 enrichment at FGFR2 and CD44 loci after SET2 modulation.** Quantitative chromatin immunoprecipitation of H3-K36me3 FGFR2 and CD44 loci after (A-D) overexpression of Flag-Set2 (SET2) or (E-H) downregulation of SETD2 (siSETD2), respectively, in PNT2 (red and yellow) or hMSC (black and grey) cells. Overexpression of EGFP and downregulation of Cyclophilin B (siCycB) were used as controls. The % input was normalized to unmodified-H3 and values represent means  $\pm$  S.E.M. from 3 independent experiments. \* indicates  $p < 0.05$  in t-student test compared to control.



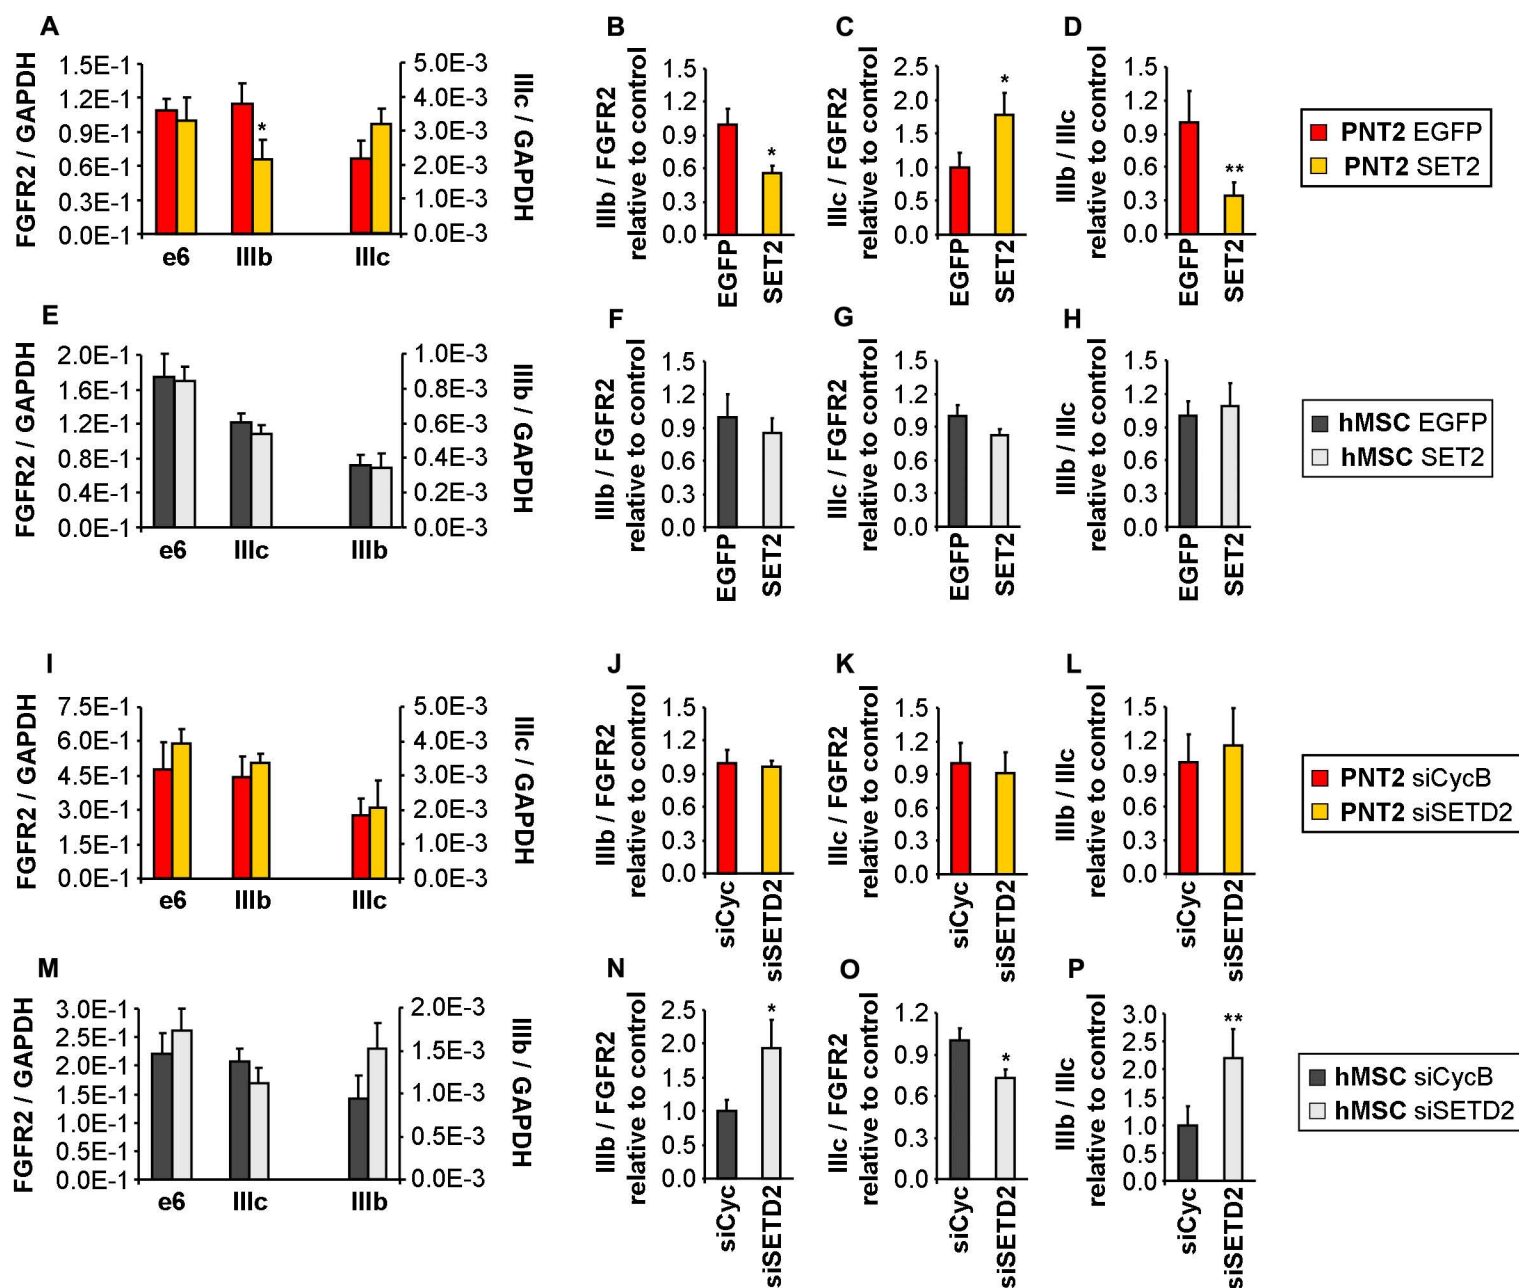

### Supplementary Fig. 6. Quantitation of FGFR2 exon usage upon SET2 expression.

Detection by qPCR of FGFR2 e6, IIIb and IIIc after (A-H) overexpression of Flag-Set2 (SET2) or (I-P) downregulation of SETD2 (siSETD2) in PNT2 (red and yellow) or hMSC (black and grey) cells. (A,E,I,M) Levels of FGFR2 exons e6, IIIb and IIIc normalized to GAPDH. (B,C,F,G,J,K,N,O) Levels of exons IIIb and IIIc normalized to FGFR2 e6 and shown relative to EGFP or Cyclophilin B (siCycB) controls. (D,H,L,P) Exon ratio IIIb/IIIc relative to control. Values represent means  $\pm$  S.E.M from 4-6 independent experiments. \* indicates  $p < 0.05$  and \*\* indicates  $p < 0.01$  in a t-student test compared to control.

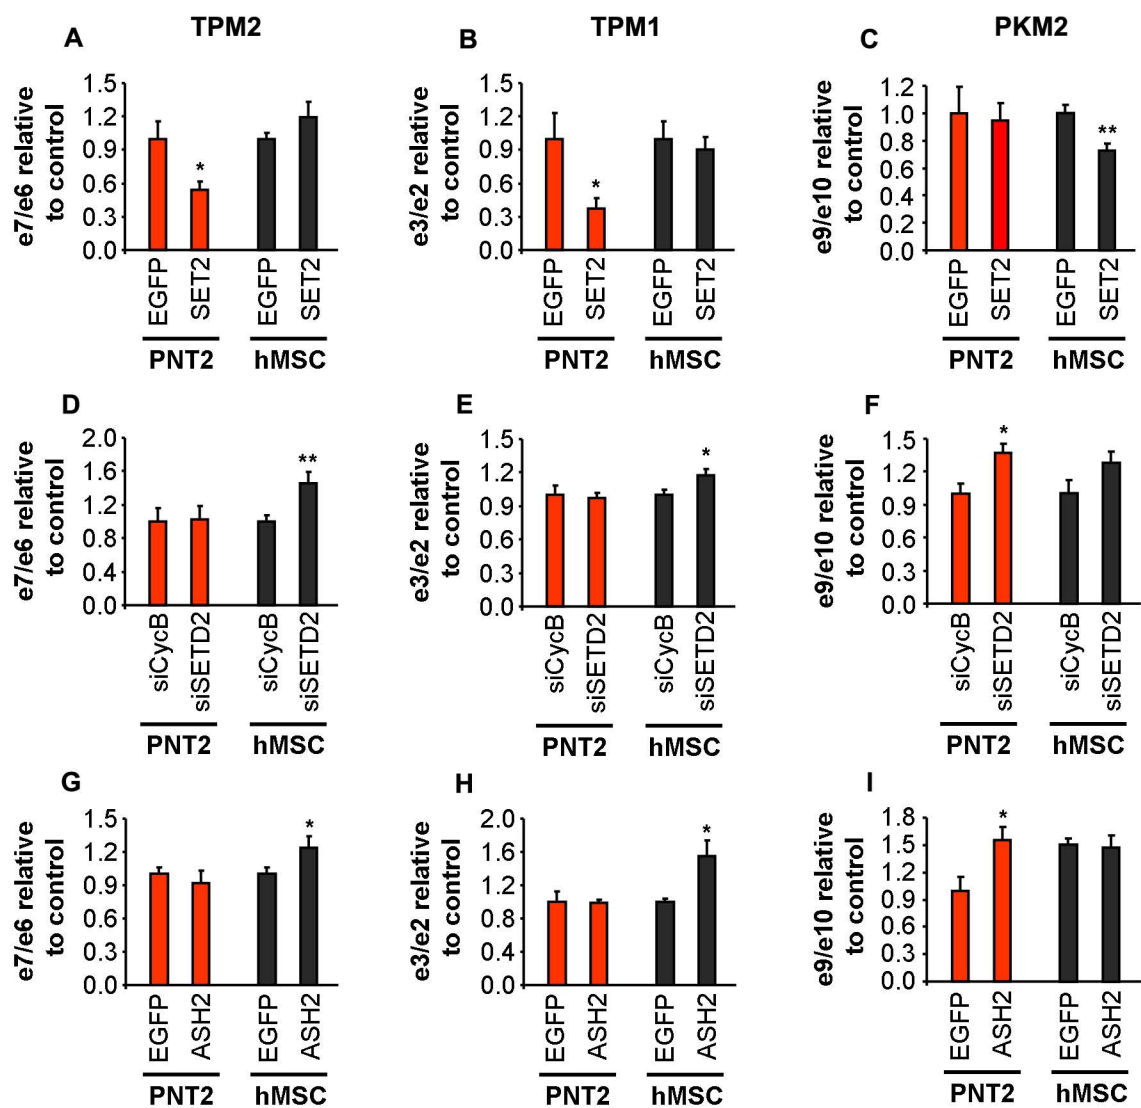

**Supplementary Fig. 7. Quantitative RT-PCR analysis of exon ratios in PTB-dependent alternatively spliced genes. (A-C) Overexpression of Flag-Set2 (SET2), (D-F) downregulation of SETD2 (siSETD2) or (G-I) overexpression of Flag-ASH2 (ASH2) in PNT2 (red) or hMSC (black) cells. Ratios are: exon e7/e6 for TPM2, exon e3/e2 for TPM1 and exon e9/e10 for PKM2. Values represent means  $\pm$  S.E.M of percentages relative to overexpression of EGFP or downregulation of Cyclophilin B (siCycB) used as controls from 4-6 independent experiments. \* indicates  $p < 0.05$  and \*\* indicates  $p < 0.01$  in a t-student test compared to control.**



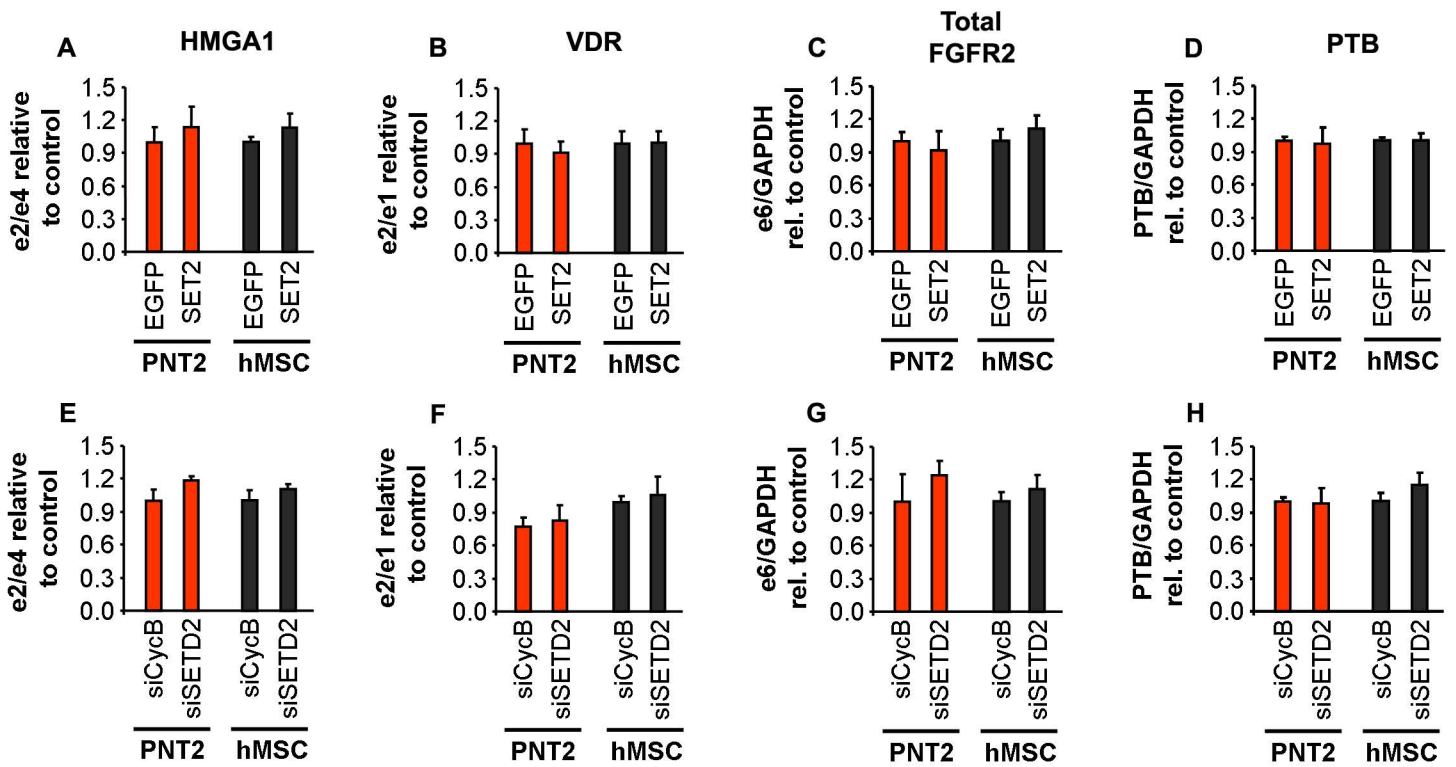

**Supplementary Fig. 8. Quantitative RT-PCR analysis of exon ratios in non PTB-dependent alternatively spliced genes and total levels of FGFR2 and PTB. (A-D)** Overexpression of Flag-Set2 (SET2) or (E-H) downregulation of SETD2 (siSETD2) in PNT2 (red) or hMSC (black) cells. Ratios are: exon e2/e4 for HMGA1, exon e2/e1 for VDR and the constitutively included FGFR2 exon e6 or PTB relative to GAPDH. Values are percentages relative to overexpression of EGFP or downregulation of Cyclophilin B (siCycB) used as controls. Values represent means  $\pm$  S.E.M from 3-4 independent experiments. No significant differences were observed in a t-student test compared to control.

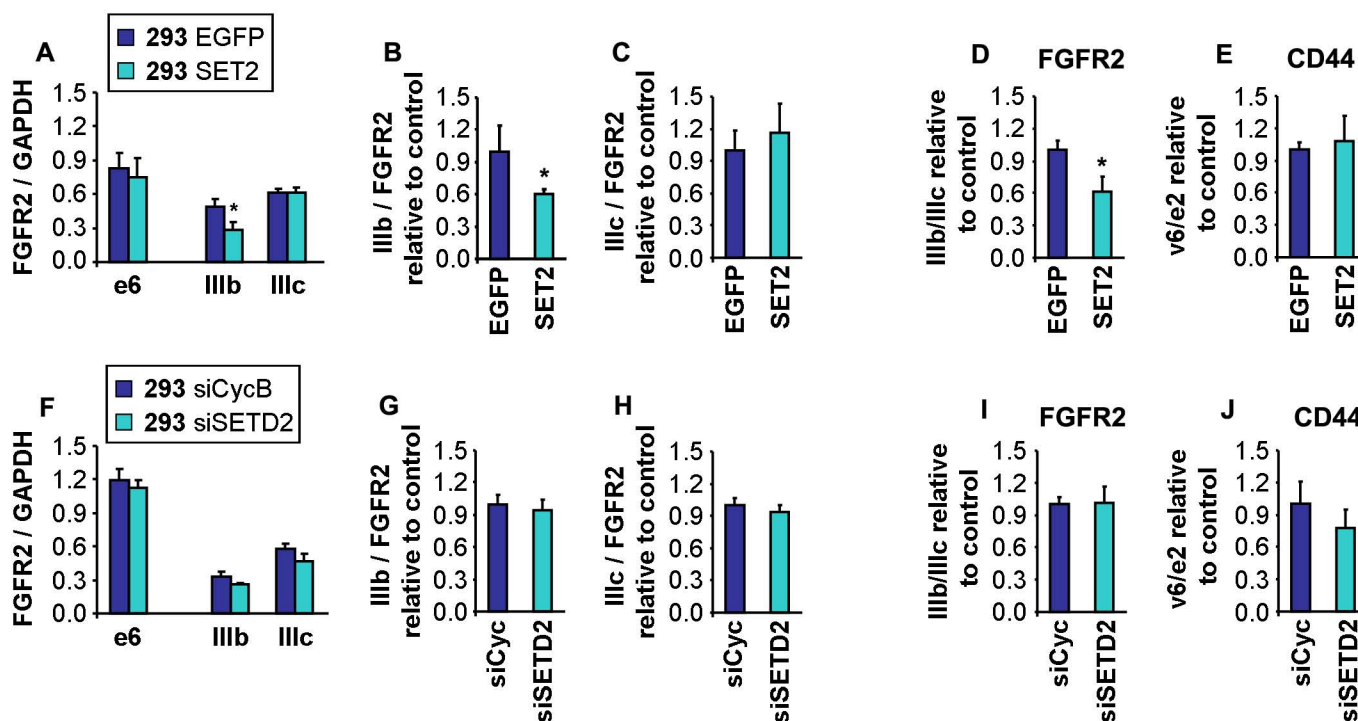

**Supplementary Fig. 9. Quantitation of FGFR2 exon usage in HEK 293.** Detection by qPCR of FGFR2 e6, IIIb, IIIc, and CD44 exon v6, e2 after (A-E) overexpression of Flag-Set2 (SET2) or (F-J) downregulation of SETD2 (siSETD2) in HEK293 cells (dark and light blue). (A,F) Expression levels of FGFR2 exons e6, IIIb and IIIc normalized to GAPDH. (B,C,G,H) Expression levels of exons IIIb and IIIc normalized to FGFR2 e6 and shown relative to EGFP or Cyclophilin B (siCycB) controls. (D,E,I,J) Exon ratio IIIb/ IIIc for FGFR2 and v6/e2 for CD44 relative to control. Values represent means  $\pm$  S.E.M from 3-6 independent experiments. \* indicates  $p < 0.05$  in a t-student test compared to control.

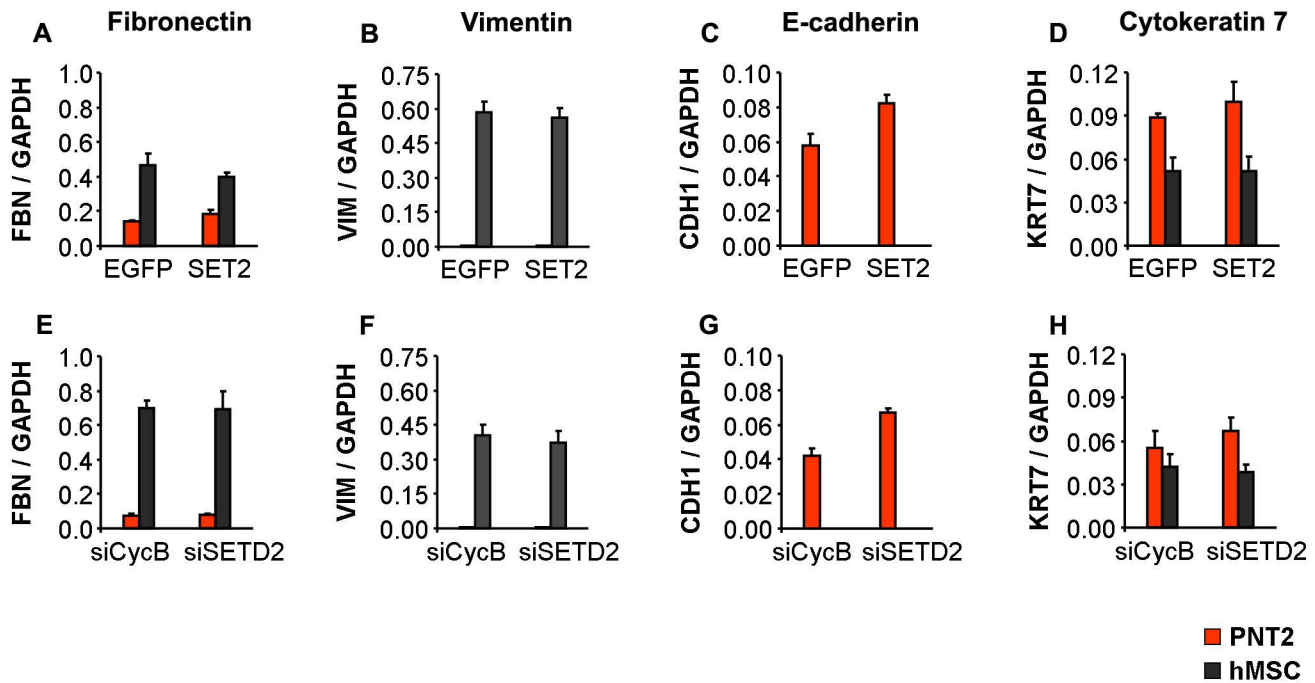

**Supplementary Fig. 10. Absence of epithelial-to-mesenchymal transition upon SET2 modulation.** Quantitative RT-PCR analysis of mesenchymal (Fibronectin and Vimentin) and epithelial (E-cadherin and Cytokeratin 7) cell markers after (A-D) overexpression of Flag-Set2 (SET2) or (E-H) downregulation of SETD2 (siSETD2) in PNT2 (red) or hMSC (black) cells. Overexpression of EGFP and downregulation of Cyclophilin B (siCycB) were used as controls. Values were normalized to GAPDH and represent means  $\pm$  S.E.M from 3 independent experiments. No significant differences were observed in a t-student test.

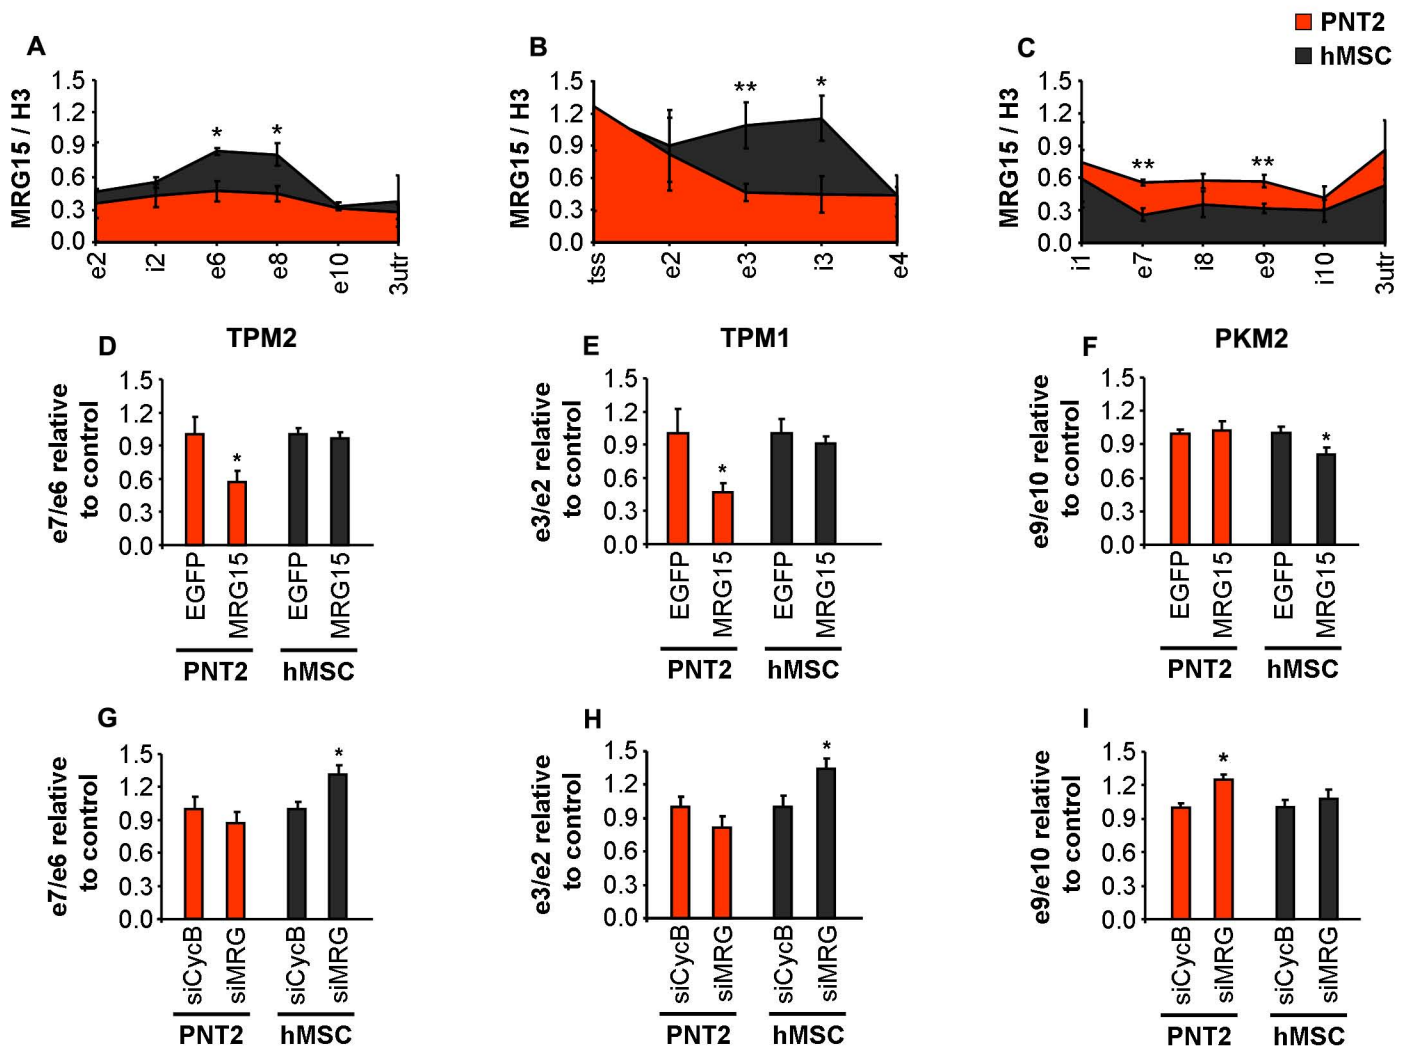

**Supplementary Fig. 11. Modulation of TPM2, TPM1 and PKM2 splicing upon MRG15 modulation.** (A-C) Chromatin immunoprecipitation of MRG15 along TPM2, TPM1 and PKM2 genes in PNT2 (red) and hMSC (black) cells. The % input was normalized to unmodified-H3 and values represent means  $\pm$  S.E.M from 4 independent experiments. \* indicates  $p < 0.05$  and \*\* indicates  $p < 0.01$  in t-student test comparing the two cell types. (D-I) Quantitative RT-PCR analysis of exon ratios after (D-F) overexpression of EGFP-MRG15 or (G-I) downregulation of both MRG15 and MRGX (siMRG) in PNT2 (red) or hMSC (black) cells. Ratios are: exon e7/e6 for TPM2, exon e3/e2 for TPM1 and exon e9/e10 for PKM2. Values represent means  $\pm$  S.E.M of percentages relative to overexpression of EGFP or downregulation of Cyclophilin B (siCycB) used as controls from 4-6 independent experiments. \* indicates  $p < 0.05$  in t-student test compared to control.

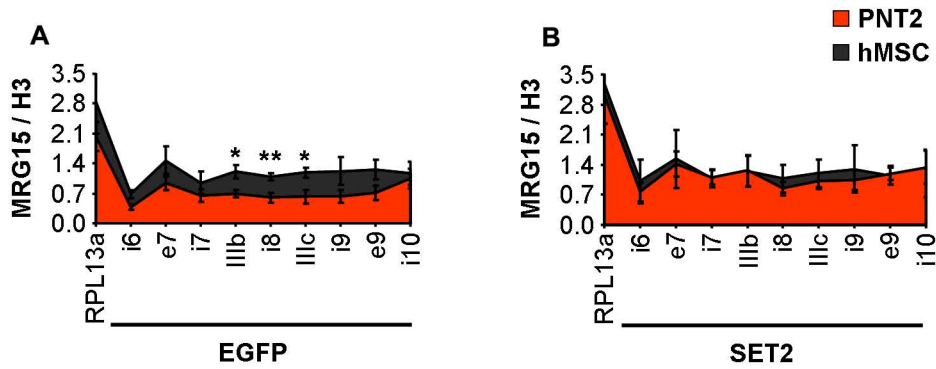

**Supplementary Fig. 12. H3-K36me3 recruits MRG15 to FGFR2.** Chromatin immunoprecipitation of MRG15 along FGFR2 after overexpression of EGFP (A) or SET2 (B) for 48h in PNT2 (red) or hMSC (black) cells. % input was normalized to unmodified-H3. Values represent means  $\pm$  S.E.M from 4 independent experiments. \* indicates  $p < 0.05$  and \*\* indicates  $p < 0.01$  in t-student test comparing the two cell types.

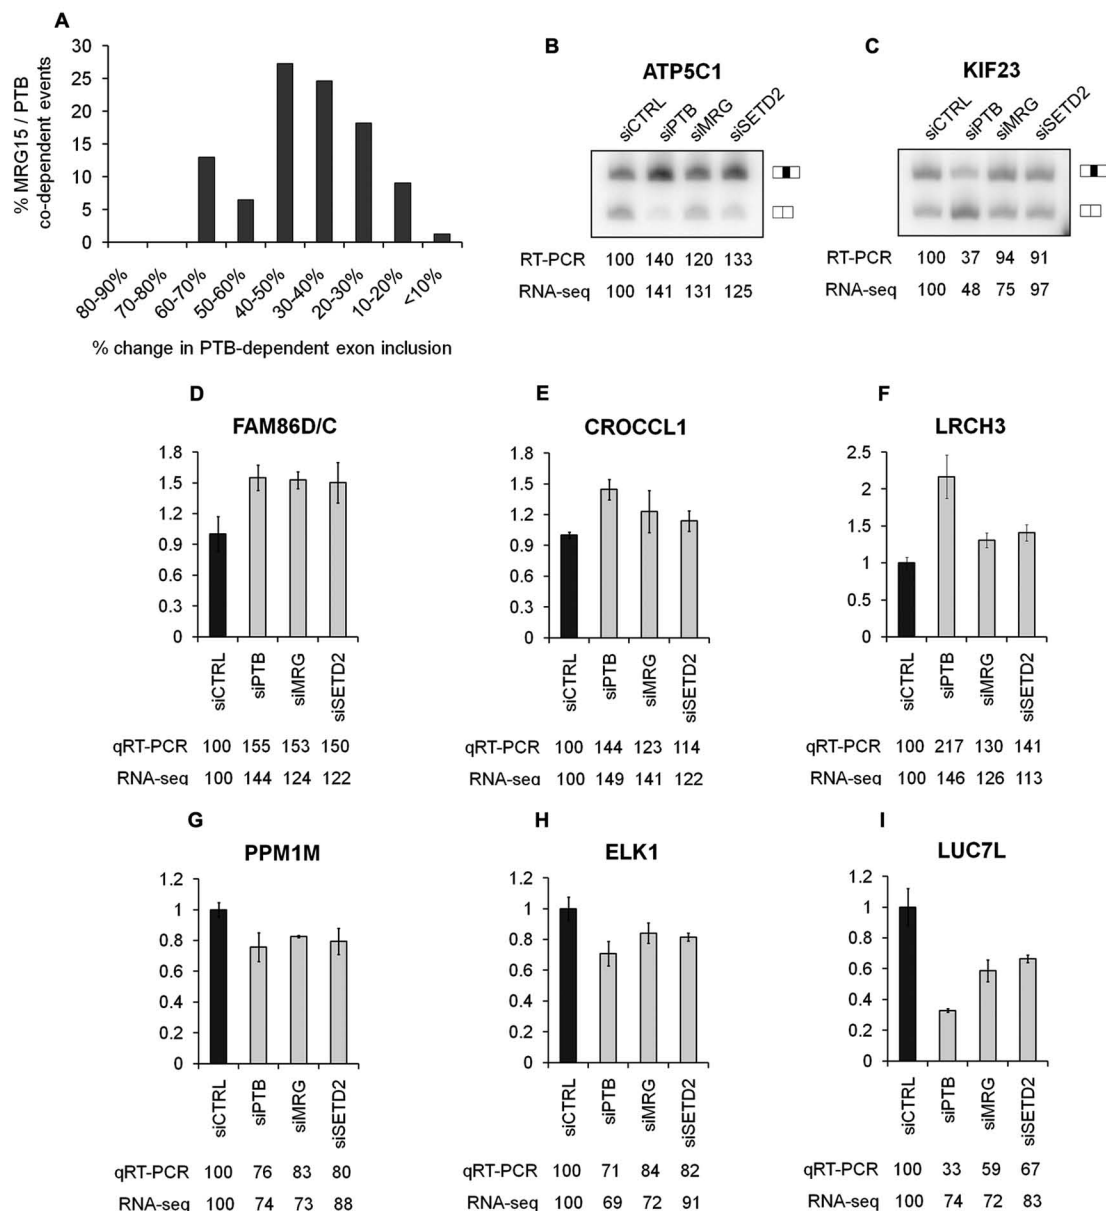

**Supplementary Fig. 13.** (A) Percentage of MRG15/PTB co-dependent alternatively spliced events versus the degree of PTB-dependence (percent of change in exon inclusion upon downregulation of PTB). Events that are moderately PTB-dependent are the most sensitive to MRG15 loss. RNAcompete analysis<sup>59</sup> of RNA binding specificities to determine the relative preferences of RNA binding proteins for short RNAs (k-mers) confirmed that PTB binding sites in alternative exons and their flanking intron sequences within 500 nts were on average stronger (7-mer score -0.02) in PTB-dependent events that undergo >50% change in splicing than in PTB-dependent splicing events of 15-50% change (7-mer score -0.04;  $p=6.4e-05$ , Wilcoxon Rank Sum Test). Furthermore, PTB/MRG15 co-dependent events were in general associated with weaker PTB binding sites (7-mer score -0.048) than PTB-dependent events that are MRG15 independent (7-mer score -0.036;  $p=9.3e-03$ , Wilcoxon Rank Sum Test). (B-I) Validation of predicted PTB, MRG15 and SETD2-dependent alternative splicing events by radioactive (B-C) and quantitative real-time PCR (D-I). 8 out of 11 candidate genes that were predicted by high-throughput RNA sequencing to be PTB, MRG15 and SETD2-dependent in hMSC downregulated cells were successfully validated. The percentage of change in exon inclusion between non-targeting siRNA control (siCTRL) and targeting siRNA (siPTB, siMRG or siSETD2) in both quantitative RT-PCR (qRT-PCR) and RNA-deep sequencing (RNA-seq) are given below each graph for comparison.

## SUPPLEMENTARY TABLES

**Supplementary Table 1. PTB, MRG15 and SETD2 co-dependent events.** List of predicted PTB and MRG15-dependent alternative splicing events that change the percentage of exon inclusion  $\geq 15\%$  upon specific downregulation in hMSC cells. The changes in alternative splicing in SETD2 downregulated cells are also shown. C1 and C2: flanking constitutive exon sequence, A: alternative exon sequence.

| Assay         | Name          | FOR                      | REV                       | Prod. length (bp) | Ta (°C)   |
|---------------|---------------|--------------------------|---------------------------|-------------------|-----------|
| <b>RT-PCR</b> | hGADPH        | TTCGACAGTCAGCCGCATCTTCTT | CAGGCGCCCAATACGACCAAATC   | 110               | 60        |
|               | hMRG15        | AGGAGGAGGCGGCGAATCACTT   | AGAGGCCCATGAAAGCACAGCAC   | 97                | 60        |
|               | hMRGX         | TTGGAAGGGAAAGAAGGAAGATTG | GATTGCTGTCCACGAGGTTGAG    | 93                | 60        |
|               | hPTB (PTBP1)  | ACGTCACGGAGGGGAAAGTCATCT | GTTGGCAGCCTCCTCCGTGTTTCAT | 119               | 60        |
|               | hPTBP2        | TCCTTCTGCCACCCTTCACCTATC | CTTTCACAGTGCCCCCAGTGTTAG  | 95                | 60        |
|               | hSETD2        | AGCTCCCTCTCACCACCCTCTT   | CAACTTCCGGCGTTCCTCTGT     | 138               | 60        |
|               | hGAPDH (e6)   | GTGGAGTCCACTGGCGTCTTC    | CTGATGATCTTGAGGCTGTTGTCA  | 158               | 60        |
|               | hGAPDH (e7)   | CAATGCCTCCTGCACCACCAACT  | AGCGCCAGTAGAGGCAGGGATGAT  | 196               | 60        |
|               | hCD44         | GACAAGTTTTGGTGGCACG      | CACGTGGAATACACCTGCAA      | 105               | 60        |
|               | hCD44 (v6)    | ATCAAGCAGGAAGAAGGATGGATA | TGAGAATACTCTGCTGCGTTGTC   | 139               | 60        |
|               | hVDR          | GAACAGCTTGCCACCCG        | GCAGGTAAGTGGAGCCCAG       | 97                | 60        |
|               | hVDR (e2)     | TAGCCCAGCTGGACGGAGAAATG  | CTGAAGGAGCAGGGGGCAGGTAA   | 191               | 60        |
|               | hHMGA1        | CCCAGCGAAGTGCCAACACCTAAG | GCCCTCCTCTCCTCCTTCTCCAGT  | 150               | 60        |
|               | hHMGA1 (e2)   | GACTCCGAGCCGGGGCTATTTCTG | CGGTGCTGGGCGCTGAGGAC      | 111               | 60        |
|               | hFGFR2(e6)    | TCCATCAATCACACGTACCACCTG | ACTCTACGTCTCCTCCGACCACTG  | 112               | 60        |
|               | hFGFR2 (IIIb) | AAGTGCTGGCTCTGTTCAATGT   | GTAGTCTGGGGAAGCTGTAATCTC  | 161               | 60        |
|               | hFGFR2(IIIc)  | TGAGGACGCTGGGGAATATACG   | TAGTCTGGGGAAGCTGTAATCTCCT | 123               | 60        |
|               | hTPM2 (e6)    | CTGGAGCGCTCGGAGGAGAG     | TGAGGCCATCAGGGACTTGAGG    | 105               | 60        |
|               | hTPM2 (e7)    | GGAGGCCCAGGCGGACAA       | GCCACAGACCTCTCGGCAAATC    | 120               | 60        |
|               | hTPM1 (e2)    | AGCAGGCGGAGGCCGACAAGA    | TCCTCCGACACCCGAGCAACT     | 97                | 60        |
|               | hTPM1 (e3)    | CTCAAGGGCACCGAAGATGAACTG | CTCAACCAGCTGGATGCGTCTGTT  | 141               | 60        |
|               | hPKM2 (e9)    | GGAGAAACAGCCAAAGGGGACTAT | GAGGCTCGCACAAGTTCTTCAAAC  | 119               | 60        |
|               | hPKM2 (e10)   | TGCCGTGGAGGCCTCCTTCAAGT  | GGGGCACGTGGGCGGTATCTG     | 102               | 60        |
|               | hCROCCL1      | CGGCGGAAGGCTGAGAAGGAA    | AGGCTGTGCCGTGTACCCATCAAC  | 167               | <b>65</b> |
|               | hCROCCL1 (AS) | CTGCAGGCCGAGAAGACCGAGG   | GAGGGCGCTCAGCTTGGACAGG    | 138               | <b>65</b> |
|               | hLRCH3        | CAAAAAGCATCACAAAGTCCACAA | CATGCACAAGGCACTATCATCAGT  | 114               | <b>60</b> |
|               | hLRCH3 (AS)   | GCTGCTACCCTGCCTCATTCTTC  | CGCTGAGGCTGATTTCTCTGGATA  | 149               | <b>60</b> |
|               | hFAM86D/C     | AGAACGCGGGGAGCGAACTCT    | AAATATCCCGCAGCAGCTCAGAATC | 138               | <b>60</b> |
|               | hFAM86 (AS)   | GGTGCTGGTGGAGACCCTGATG   | ACCCCGACCAGCGACACGA       | 104               | <b>60</b> |
|               | hPPM1M        | GGCCATCTTGGTGC GGAGAG    | CACCAGCCAGAAGCTCAGGATAGA  | 116               | <b>65</b> |
|               | hPPM1M (AS)   | TCTGCCCCAGTGACCCTCAGTTTG | GCTGTGCAGCCGCCATCTG       | 148               | 65        |
|               | hLUC7L        | TTCCATGCCTGCATCCAGTTTTCA | GCCAGGCGACGGTCATTGTCA     | 96                | <b>60</b> |
|               | hLUC7L (AS)   | GGGGGACCCTACCCTCAGAA     | TCTCCGATCACATTCAGCAATAAA  | 102               | <b>60</b> |
|               | hELK1         | CTCGGGGAGCAGGAGCACCAGT   | GCCCAAACCCGGCTCCACATTA    | 145               | 60        |
|               | hELK1 (AS)    | AACGCCACCGCCACGCTACA     | CGCCACGGATTGATTGCTACG     | 103               | <b>60</b> |
|               | hE-Cadherin   | TTGACGCCGAGAGCTACAC      | GACCGGTGCAATCTTCAA        | 93                | 60        |
|               | hKRT7         | CTGCCTACATGAGCAAGGTG     | GGGACTGCAGCTCTGTCAAC      | 108               | 60        |
|               | hVimentin     | CTTCAGAGAGAGGAAGCCGA     | ATTCCAATTTGCGTTCAAGG      | 97                | 60        |
|               | hFibronectin  | CCATAAAGGGCAACCAAGAG     | ACCTCGGTGTTGTAAGGTGG      | 91                | 60        |



| Assay | Name         | FOR                        | REV                       | Prod. length (bp) | Ta (°C) |
|-------|--------------|----------------------------|---------------------------|-------------------|---------|
| CHIP  | SAT          | CATCGAATGGAAATGAAAGGAGTC   | ACCATTGGATGATTGCAGTCAA    | 160               | 60      |
|       | hEVX1.tss    | TTCGCTGTGGCAGACGTTTCTATT   | AAGCCCCATTGCCCTCTTCTTT    | 121               | 60      |
|       | GAPDH.tss    | CCCAACTTTCGCCCTCTC         | CAGCCGCTGGTTCAACTG        | 293               | 65      |
|       | GAPDH.i2     | CCAAGCCGGGAGAAGCTGAGTCAT   | AAGGGCGGGGCCGTGAGGT       | 116               | 60      |
|       | GAPDH.e3     | AGGTGGCCTAGGGCTGCTCACATA   | GGCGCCAATACGACCAAATCTAA   | 93                | 60      |
|       | GAPDH.e6     | ATCTCTGCCCCCTCTGCTGATGC    | GGCCTGCCTTCTCACCTGAT      | 100               | 60      |
|       | GAPDH.e9     | GAATCTCCCCTCCTCACAGTTG     | GGTTGAGCACAGGGTACTTTATTG  | 105               | 60      |
|       | GAPDH.3UTR   | CTGGGGAGGGACCTGGTATGTTC    | TGCCAGCTTCTGTAGCACTCAAG   | 119               | 60      |
|       | CyclinA.e1   | GCGGCGCCATTTCTGACGA        | CGCCCCGCTGCCTTTGTC        | 92                | 60      |
|       | CyclinA.i1   | CCCCACCCACCTATGAGTGAGT     | ACCCCTCCATTCTCATCAAGACCT  | 149               | 60      |
|       | CyclinA.e2   | TAAGGGCCTGGATACCAAGAAGT    | ACTGCTGCACGATCAGGGGTA     | 129               | 60      |
|       | CyclinA.e4   | TATGTTGACAGGGTGGTGACTTCA   | CAGGACCCGTATGCTTTAGGATG   | 108               | 60      |
|       | CyclinA.3UTR | ATTCCCTGGGTGATACATTCAAT    | ATGACAACGTGGTGAGGCTATTCT  | 145               | 60      |
|       | VDR.i1       | TCTGTGCAGACTCGGCAGTTGGTT   | CCTCGGGCCTCATGGGTATTCC    | 133               | 60      |
|       | VDR.i4       | CCCCTCAGTGACCAGAGCGAAATG   | CTCAGGCCTCAGAATGCCCGTAAT  | 135               | 60      |
|       | VDR.e6       | CTGAGGAGCAGCAGCGCATCATTG   | TCCTCCCAGCAGGCAGACATACCC  | 111               | 60      |
|       | VDR.e9       | ACCTGGGGAGCGGGGAGTATG      | GGGCTCTGCAAACCAGCAAAGTAG  | 123               | 60      |
|       | CD44.i4      | TCCCTGCTGAGGCTATTAGTCTG    | CCCCTTGTTCCTACTCTCC       | 115               | 60      |
|       | CD44.v3      | AGTCACCTCCGCTTTCCTCCA      | CTTCGCCACTTGTCGCCACAT     | 111               | 60      |
|       | CD44.v5      | TCACCTGAACAGGAATGGATACAA   | AGGGCCTCTGCTACAATCTACTA   | 128               | 60      |
|       | CD44.v7      | TGGAATGGTGCTATGTGGCTTAC    | AGAAATGAAGGGAAAATCAGGTTG  | 102               | 60      |
|       | CD44.i16     | TCCTTTGCCCCAGCTTGCCTAA     | TGGGAAGAATCTTGCTGCCTGATG  | 121               | 60      |
|       | HMGA1.tss    | CCCCGCCCCCTGAGTGACAC       | CCGCGCCAGCGCCAGAAATA      | 141               | 55      |
|       | HMGA1.i2     | GGAGCAGGATAAATCACCAACCA    | GCATCAAGAGACCCTCCAGACAG   | 108               | 60      |
|       | HMGA1.e3     | GGGCAGACCCCTCCATCC         | CATCTCGCTTCAGCCACTTTCTAC  | 120               | 60      |
|       | HMGA1.e5     | AACCCTCTAGAAAACCACCACAAC   | ACTCAACACCCTCAACTCAAAGA   | 122               | 60      |
|       | HMGA1.3UTR   | CCAGGATTCCCCAGCCAAACT      | CACCCCTCCTGCCTTCTGTAAACC  | 126               | 60      |
|       | FGFR2.tss    | GGCAACCCTCCCCGAGTATCAAG    | GCTGGCCAACGGCTCGCTGAG     | 139               | 60      |
|       | FGFR2.i6     | TATCTTAAACGCACCCACACTAC    | CAAGGTCACAACTATGCTCCTAT   | 162               | 60      |
|       | FGFR2.e7     | TGTTATTTCAAAGGTGTCAGCCA    | GAGAGGGAAGAAAGGAGGAGTG    | 131               | 60      |
|       | FGFR2.i7     | GTGTTGATTGTTACTCTGATGTTGTT | TATTGTCTAAATCACCTCTGAATGG | 159               | 60      |
|       | FGFR2.eIIb   | AGCCCTTAATGCCGCTGTTTGA     | TAACGGCCAACCAGGAAGGTCTTAG | 102               | 65      |
|       | FGFR2.i8     | TGATCCTTATGAGTTGCTGTTCTTG  | TTGCCTTTAGTAGCGTCCAGTAGTA | 93                | 60      |
|       | FGFR2.eIIc   | GAATATACGTGCTTGCGGGTAAT    | TAAAAGGGGCCATTTCTGATAACA  | 166               | 60      |
|       | FGFR2.i9     | GGAGCGGCACCTCTGAATGTCA     | CAAGCCAAGATGGCAGGAGCAT    | 139               | 65      |
|       | FGFR2.e9     | CCTGGGTCTGGTGGTCAAAT       | TAAGCAGGCCATAGAGTTAGCACAC | 158               | 65      |
|       | FGFR2.i10    | GGAATGAAAAGCCCCAGAAA       | GCCTCATAAATGCCTAGAAACAAC  | 134               | 60      |
|       | FGFR2.i13    | TGTGGCTGGACAACTGGAGGTA     | AAAGAAAACGCAGTGTGGCTCTAA  | 175               | 60      |
|       | FGFR2.e14    | TTCCTTTTTGTTCTGGCGGTGTT    | CTCTGGCGAGTCCAAAGTCTGCTA  | 148               | 60      |
|       | FGFR2.e15    | AGGGGCGGCTTCCAGTCAAGT      | CAAGCCCAGGAAAAAGCCAGAGAA  | 112               | 60      |

|            |                            |                            |     |    |
|------------|----------------------------|----------------------------|-----|----|
| FGFR2.i15  | TCCCAGAGATTGAGCCTCCTGAAC   | AATCACATGCCCCAGATGAGTTGC   | 128 | 60 |
| FGFR2.3UTR | CCGTGCGTACTGGCTGTG         | CTGCATTTGTGCTCTGTAAGTGTG   | 121 | 60 |
| TPM1.e1    | CGGCTCCGCGCTCGCACTCC       | TTCTTGTCGGCCTCCGCCTGCTCAG  | 181 | 65 |
| TPM1.e2    | CCGAGGGGGCCCCAGCCAACC      | GGTCCCCTCGTCTCCGACACC      | 155 | 65 |
| TPM1.e3    | GGATGCCGCCTCTGACTGCTA      | GGCATTCTCTACAAACCTTGGTG    | 213 | 60 |
| TPM1.i3    | TTCTGGGGTGGTGGCTTTCACT     | GTGCCTCTCCCACTTGACCTGTC    | 158 | 60 |
| TPM1.e4    | TACATGGCTGAGCCTGGGTAAGTC   | TTGCCTGTAAACAAGAGCGTCAT    | 94  | 60 |
| TPM2.e2    | CCGTGAAGGAGGCCAGGAGAACT    | GCGCTGGGGACATAAGGGGATAAGGT | 162 | 60 |
| TPM2.i2    | GCTTGATTCTGTGACGGGCTATTCTT | GGTCTGATGCAGCTCTGATTCTACA  | 117 | 60 |
| TPM2.e6    | GGGCTGAGGTGGCCGAGAGGTAAAGA | GCAGCGGGCAGGGGTGAGAGAAC    | 142 | 60 |
| TPM2.e8-9  | AGTCTCCCCTCAAGCCACCCTAATC  | GCCCTCCCACAGACTACTGCCTAAG  | 108 | 60 |
| TPM2.e10   | AGGGGAGCAGGCAGGAGGAGCAG    | AGCAAAGGAGGGTGAAGGGGATAGG  | 141 | 60 |
| TPM2.3UTR  | CAGGCTCTGTGAAGCAGGGAGTCTG  | TCACCCTGCTCAAGGAAAATGTGTCA | 175 | 60 |
| PKM2.i1    | GCCTTTGGTGTTCGCTGTA        | GACCCTGGCTCCAATCCTAATC     | 102 | 60 |
| PKM2.e7    | CCCCCAACTTTGTCCATCAGG      | GCACCGTCCAATCATCATCTTC     | 135 | 60 |
| PKM2.i8    | GCCTGTCAGTGGGGTCAGAGACTA   | TCCAAACCTTGACAGCCCTAAAGTA  | 118 | 60 |
| PKM2.e9    | GCAGCAGCTTTGATAGTTCTGACGG  | ACCTCCCTGGCGGTGTTCTTAC     | 172 | 60 |
| PKM2.i10   | GTCAGTGCATTGGCAGCGAGAG     | CAGAACCCTCTACACCCTGAAC     | 94  | 60 |
| PKM2.3UTR  | AAGATGGGAAAGAGCAGGGACAAG   | GGGATACGCTAATGCAGGAAGACC   | 115 | 60 |

**Supplementary Table 2. List of oligonucleotide pair sequences used in real-time PCR. Ta:** recommended annealing temperature.

## SUPPLEMENTARY REFERENCES

- S1. T. Okamoto et al., *Bioch. Biophys. Res. Commun* **295** (2002)
- S2. P.S. Pardo et al., *J. Biol. Chem.* **277** (2002)
- S3. K. Tominaga et al., *Gene* **294** (2002)
- S4. H. Kimura et al., *Cell Struct.Funct.* **33** (2008)
- S5. B. Langmead, C. Trapnell, M. Pop, S. L. Salzberg, *Genome Biol.* **10**, R25 (2009).
- S6. Q. Pan, O. Shai, L. J. Lee, B. J. Frey, B. J. Blencowe, *Nat. Genet.* **40**, 1413 (2008).
- S7. Q. Pan et al., *Mol. Cell* **16**, 929 (2004).
- S8. Q. Pan et al., *Trends in Genet.* **21**, 73 (2005).
- S9. D. Ray et al., *Nature Biotech.* **27**, 667 (2009).
